# Supplementary material for: BMP signalling controls the construction of vertebrate mucociliary epithelia
Source: Oxford University Press journal article supplement (doi:10.1242/dev.118679), 2015-01-01
Supplement: dev118679supp.pdf [file dev118679supp.pdf]

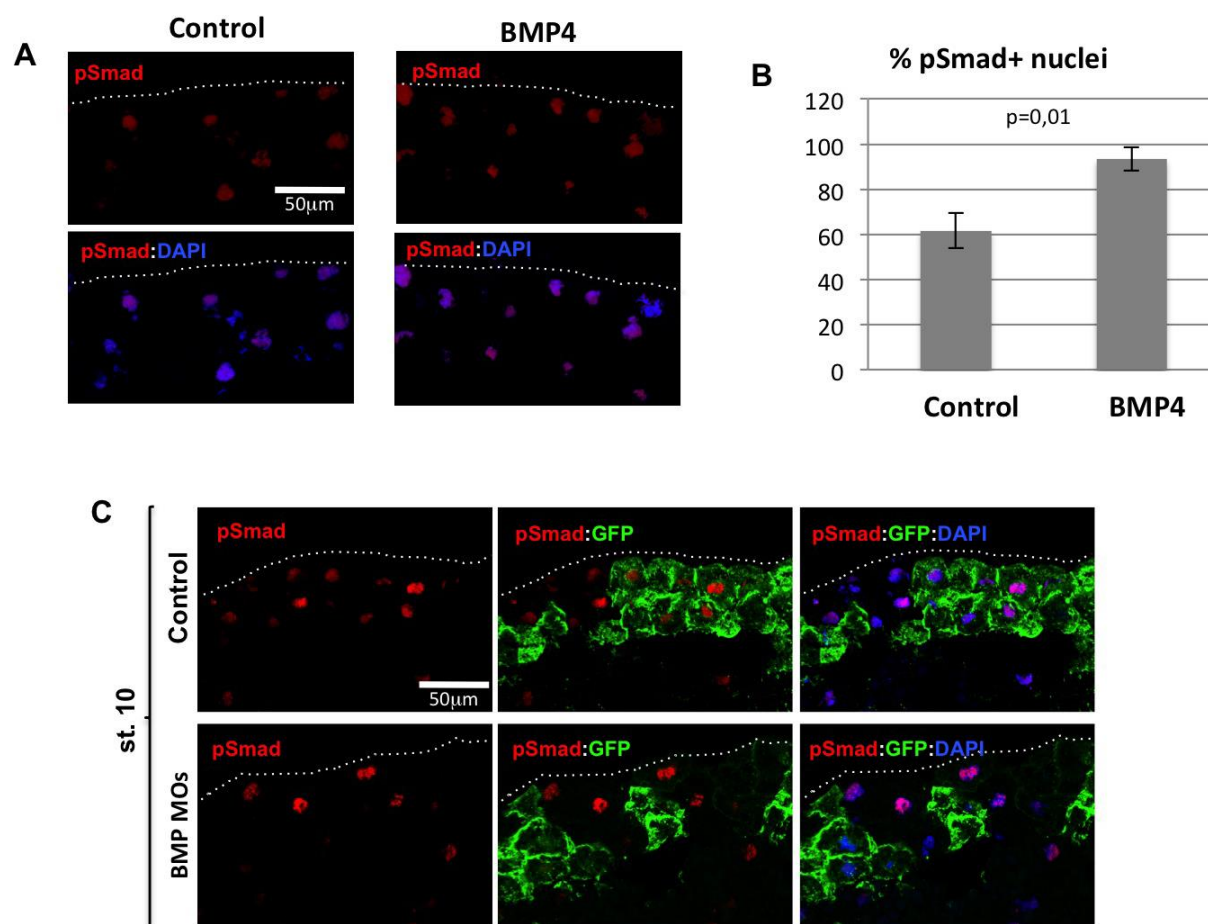

**Figure S1: Validation of pSmad1/5/8 staining in response to BMP manipulation.**

**(A):** Injection of stage 9 *Xenopus* embryos with recombinant BMP4 led to increased Smad1/5/8 phosphorylation and nuclear localization. **(B):** The percentage of nuclei positive for the pSmad signal is significantly higher in BMP-treated than in control embryos (Student's t-test). **(C):** Knocking down BMP2, BMP4 and BMP7 with specific morpholino oligonucleotides inhibited Smad1/5/8 phosphorylation. Embryos were injected with either GFP mRNA alone (upper row) or GFP mRNA and the BMP2/4/7 MOs (lower row). The pSmad1/5/8 signal was lost in cells that received the BMP2/4/7 MOs, but not in those that received only the GFP mRNA.

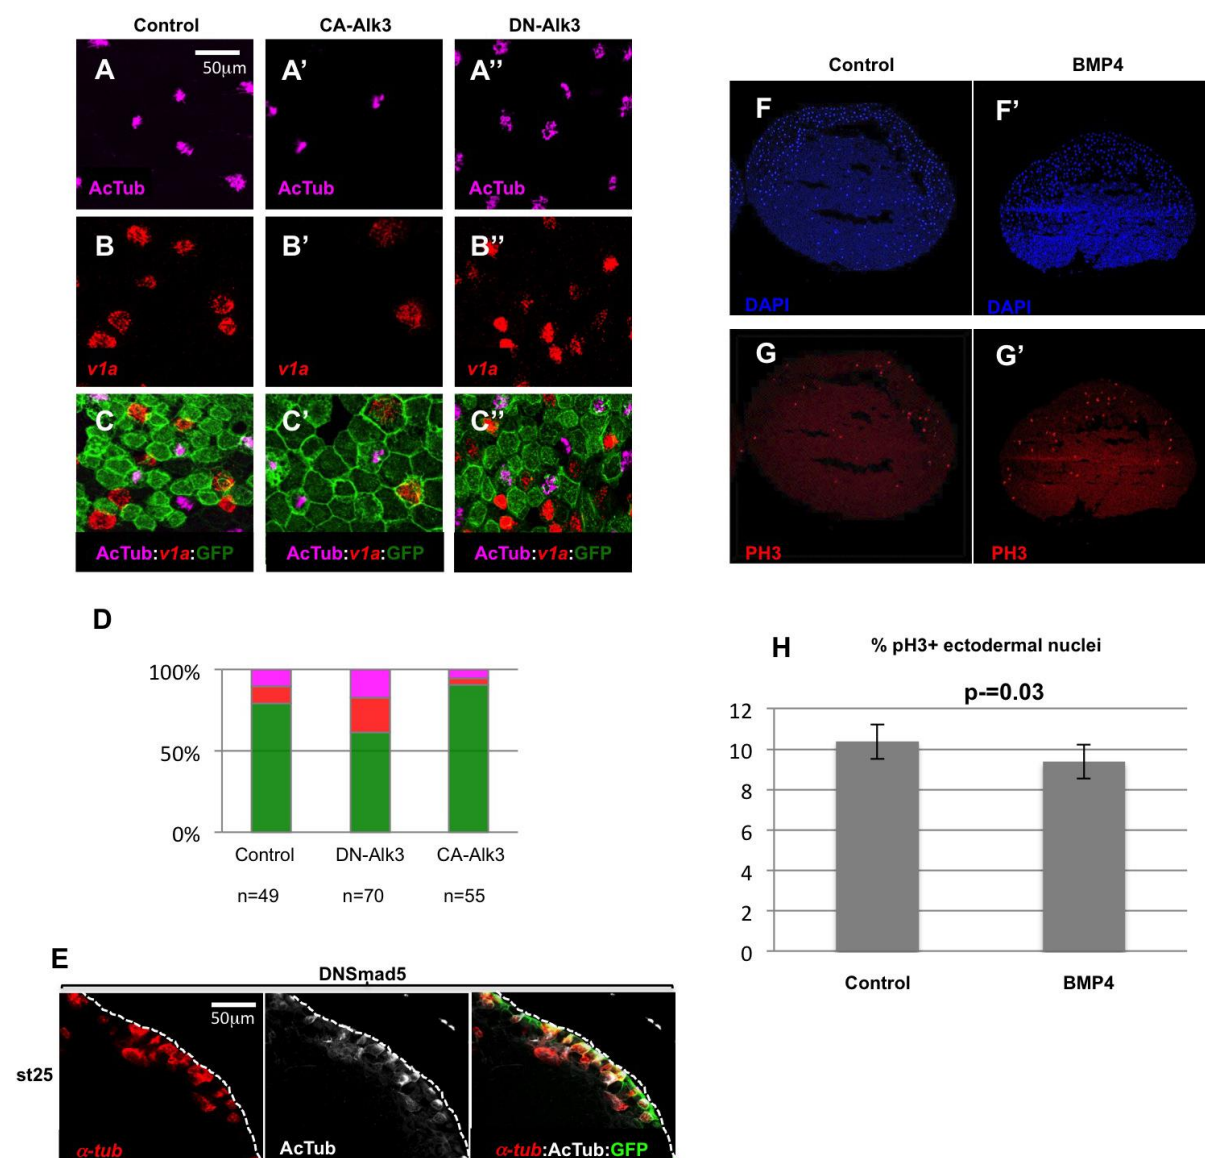

**Figure S2: Interfering with the BMP pathway alters the numbers of MCCs and ionocytes in the developing *Xenopus* epidermis.**

**(A-D):** 8-cell stage embryos were injected into the animal ventral blastomeres with synthetic mRNAs coding for GFP, alone (control; A, B, C) or together with mRNAs coding for a constitutively active (CA-Alk3; A', B', C') or a dominant negative (DN-Alk3; A'', B'', C'') version of the BMP receptor ALK3, then hybridized at stage 25 with a probe against the ionocyte marker *v1a* and antibodies against acetylated tubulin and against GFP. Activation of the BMP pathway by CA-Alk3 injection resulted in a decrease in the numbers of MCCs and

ionocytes. Inhibition of the BMP pathway by DN-Alk3 injection results in an increase in the numbers of MCCs and ionocytes. (D): quantification of the different cellular populations in injected epidermal clones. The bars represent the total number of GFP positive cells scored. Magenta: acetylated tubulin positive MCCs; red: *vla* positive ionocytes; green: GFP positive cells negative for both acetylated tubulin and *vla*. (E): Embryos injected with a synthetic mRNA coding for a dominant negative form of the zebrafish BMP pathway nuclear effector Smad5 (dnSmad5), showed supernumerary  $\alpha$ -tubulin positive MCC precursors, which only partially managed to intercalate. (F-H): Embryos were injected in the blastocoele with BSA (control) or recombinant BMP4 protein (BMP4), fixed at stage 10, cryosectioned and immunostained with an antibody against phosphorylated histone H3 (red), a hallmark of cells in mitosis. DAPI (blue) was used to stain the nuclei. The graph in (H) shows the ratio of phospho-H3 positive nuclei to the total number of ectodermal DAPI stained nuclei. BMP4 injection did not significantly modify the number of mitotic nuclei compared to controls (Student's t-test). In F-G', the animal pole (ectoderm) is up.

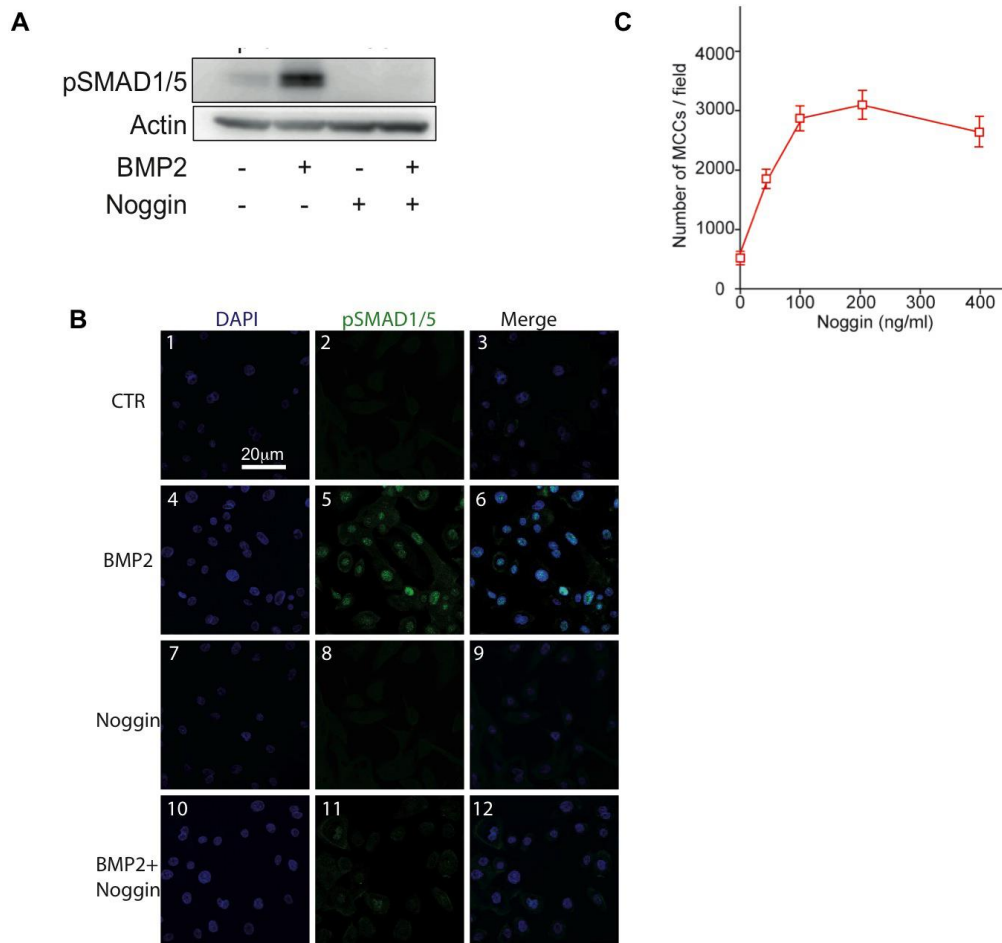

**Figure S3: Validation of BMP pathway manipulation in HAECs.**

**(A):** Expression levels of pSMAD1/5 in response to BMP2 (100ng/ml, 2h), Noggin (100ng/ml, 2h), or BMP2+Noggin (100ng/ml each, 2h) in proliferating HAECs. Actin was used as a loading control. **(B)** Proliferating HAECs were stained to identify the specific sub-cellular localization of pSMAD1/5 (in green) in untreated control cells (panels 1-3), BMP2-treated cells (100ng/ml, 2h) (panels 4-6), Noggin-treated cells (100ng/ml, 2h) (panels 7-9) and cells treated with both BMP2 and Noggin (100ng/ml each, 2h) (panels 10-12). Nuclei were stained with DAPI (in blue; panels 1,4,7,10). Data are representative of 3 independent experiments. **(C):** Dose-response curve of Noggin treatment. Regenerating HAECs were chronically treated with different doses of recombinant Noggin. Acetylated-tubulin positive MCCs were counted at LC. 100ng/ml Noggin was the minimal dose to give the maximal effect and used in the rest of the study.

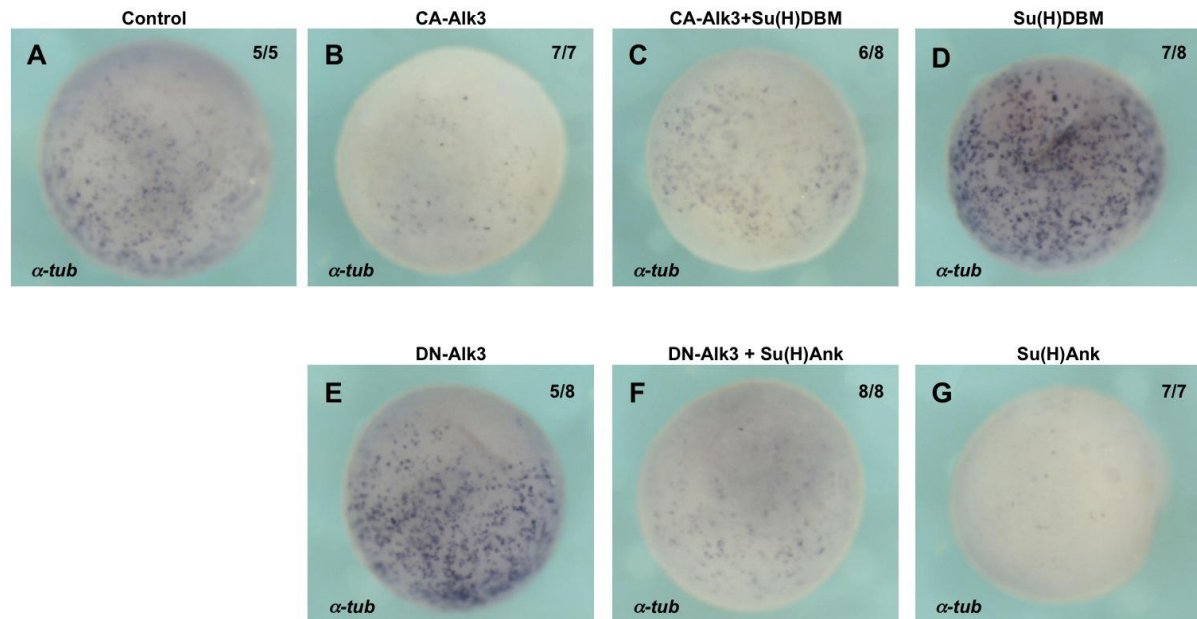

**Figure S4: The BMP and Notch pathways interact.**

Co-injection of mRNAs coding for a constitutively active form of the BMP receptor Alk3 (CA-Alk3) and a dominant negative form of the transcriptional Notch effector Suppressor-of-hairless (Su(H)DBM) (C) mitigated both the loss of  $\alpha$ -tubulin positive cells resulting from expression of CA-Alk3 alone (B) and their increase following injection of Su(H)DBM alone (D). Co-injection of mRNAs coding for a dominant negative form of the BMP receptor Alk3 (DN-Alk3) and a constitutively active form of the transcriptional Notch effector Suppressor-of-hairless (Su(H)Ank) (F) mitigated both the increase in  $\alpha$ -tubulin positive cells resulting from expression of DN-Alk3 alone (E) and their loss following injection of Su(H)Ank alone (G). The number of embryos showing the phenotype displayed over the total number of embryos examined is indicated.

**Table S1: Plasmids, morpholinos, antibodies, drugs and recombinant proteins used.**

| Plasmid name | Vector | linearized with | transcribed with |
|--------------|--------|-----------------|------------------|
| dnSmad5      | pCS2+  | NotI            | SP6              |
| CA-Alk3      | pCS2+  | NotI            | SP6              |
| DN-Alk3      | pCS2+  | NotI            | SP6              |
| GFP-CAAX     | pCS105 | AseI            | SP6              |

| Morpholino Name | Sequence                        |
|-----------------|---------------------------------|
| MO-BMP2         | 5'-GATCCCAGCGACCATTGTCAACCTG-3' |
| MO-BMP4         | 5'-CAGCATTCGGTTACCAGGAATCATG-3' |
| MO-BMP7         | 5'-TTACTGTCAAAGCATTCATTTTGTC-3' |

| Antibodies used on <i>Xenopus</i>                                                       | Source                                             | Reference     | Dilution |
|-----------------------------------------------------------------------------------------|----------------------------------------------------|---------------|----------|
| Monoclonal mouse anti-acetylated tubulin                                                | Sigma                                              | Clone 6-11B-1 | 1:200    |
| Monoclonal mouse 5G7                                                                    | Gift from Saburo Nagata (Japan Women's University) |               | 1:500    |
| Monoclonal mouse anti-P63                                                               | Abcam                                              | Ab111449      | 1:100    |
| Polyclonal rabbit anti-pSmad1/5/8                                                       | Cell signalling                                    | 9511          | 1:100    |
| Polyclonal chicken anti-GFP                                                             | 2BScientific                                       | GFP-1020      | 1:1000   |
| Polyclonal rabbit anti-Serotonin                                                        | Millipore                                          | Ab938         | 1/250    |
| Polyclonal rabbit anti-phosphoH3                                                        | Millipore                                          | 06-570        | 1 :250   |
| anti-mouse-Cy5<br>anti-mouse 647<br>anti-mouse-561<br>anti-chick-488<br>anti-rabbit-561 | Molecular Probes                                   |               | 1:500    |

| Antibodies used on HAECs | N° clone | Source                   | Reference | Dilution |         |
|--------------------------|----------|--------------------------|-----------|----------|---------|
|                          |          |                          |           | IF       | Blot    |
| Anti-acetylated tubulin  | 6-11B-1  | Sigma-Aldrich            | T7451     | 1 :1000  |         |
| Anti-HSP60               | K-19     | Santa Cruz Biotechnology | sc-1722   |          | 1 :5000 |
| Anti-Muc5AC              | 45M1     | Abcam                    | ab3649    | 1 :500   |         |
| Secondary antibodies     |          | Molecular Probe          |           | 1:500    |         |
| Anti-pSmad1/5/8          | 41D10    | Cell signaling           | 9516      | 1 :100   | 1 :1000 |
| Anti-Smad1               | D59D7    | Cell signaling           | 6944      |          | 1 :1000 |
| Anti-Actin               | I-19     | Santa Cruz Biotechnology | sc-1616   |          | 1 :5000 |

| Drug and Recombinant proteins | Source        | Reference   | Concentration           |
|-------------------------------|---------------|-------------|-------------------------|
| Dorsomorphin                  | Sigma-Aldrich | P5499       | 2mg/ml                  |
| BMP2                          | R&D           | 355-BM      | 200ng/ml                |
| Noggin                        | R&D           | 6057-NG     | 200ng/ml or see figures |
| BMP4                          | R&D           | 1128-BM-010 | 2 to 7ng/embryo         |

| Probe                  | Vector       | linearized | transcribed | Reference             |
|------------------------|--------------|------------|-------------|-----------------------|
| Dll1                   | pBS          | XhoI       | T7          | Deblandre et al. 1999 |
| FoxA1                  | pBS          | EcoRI      | T3          | Sinner et al. 2004    |
| FoxJ1                  | pCS2+        | BamHI      | T7          | Stubbs et al. 2008    |
| Foxile                 | pCMV Sport 6 | SalI       | T7          | Dubaissi et al. 2011  |
| Intelectin-1           | pBS          | EcoRI      | T7          | Hayes et al. 2007     |
| Multicilin             | pBS          | HindIII    | T3          | Stubbs et al. 2012    |
| Otogelin               | pCMV Sport 6 | SalI       | T7          | Hayes et al. 2007     |
| Tph1                   | pCMV Sport 6 | EcoRV      | T7          | Walentek et al. 2014  |
| $\alpha$ -Tubulin      | pBS          | NotI       | T7          | Deblandre et al. 1999 |
| Trim29                 | pCS2+        | EcoRI      | T7          | Hayes et al. 2007     |
| V1a                    | pCS107       | ClaI       | T7          | Dubaissi et al. 2011  |
| $\alpha$ -Dystroglycan | pCRII        | XhoI       | Sp6         | Bello et al. 2008     |

### References:

**Bello, V. Sirour, C. Moreau, N., Denker, E. and Darribère, T.** (2008). A function for dystroglycan in the pronephros development in *Xenopus laevis*. *Dev. Biol.* **317**,106-120.

**Dubaissi, E. and Papalopulu, N.** (2011). Embryonic frog epidermis: a model for the study of cell-cell interactions in the development of mucociliary disease. *Dis. Mod. Mech.* **4**, 179-192.

**Sinner, D., Rankin, S., Lee, M. and Zorn, A.M.** (2004). Sox17 and beta-catenin cooperate to regulate the transcription of endodermal genes. *Development* **131**, 3069-3080.

**Stubbs, J.L., Oishi, I., Izpisua Belmonte, J.C., Kintner, C.** (2008). The forkhead protein Foxj1 specifies node-like cilia in *Xenopus* and zebrafish embryos. *Nat. Genet.* **40**, 1454-1460.
